#### EDITORIAL NOTE

## Editorial Note: A study of blockchain-based liquidity cross-chain model

The *PLOS One* Editors

The *PLOS One* Editors issue this Editorial Note because this article [1] was identified as one of a series of submissions for which we have concerns about aspects of the peer review process. Readers are advised to interpret the article [1] with caution.

The Editors have no evidence of any author involvement in the peer review concerns.

### Reference

1. Han Y, Wang C, Wang H, Yang Y, Wang X. A study of blockchain-based liquidity cross-chain model. *PLoS One*. 2024;19(6):e0302145. <https://doi.org/10.1371/journal.pone.0302145> PMID: [38861491](https://pubmed.ncbi.nlm.nih.gov/38861491/)

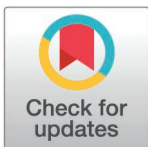

---

### OPEN ACCESS

**Citation:** The *PLOS One* Editors (2026) Editorial Note: A study of blockchain-based liquidity cross-chain model. *PLoS One* 21(5): e0349830. <https://doi.org/10.1371/journal.pone.0349830>

**Published:** May 21, 2026

**Copyright:** © 2026 The *PLOS One* Editors. This is an open access article distributed under the terms of the [Creative Commons Attribution License](https://creativecommons.org/licenses/by/4.0/), which permits unrestricted use, distribution, and reproduction in any medium, provided the original author and source are credited.
